# Supplementary material for: Septin cooperation with tubulin polyglutamylation contributes to cancer cell adaptation to taxanes
Source: PubMed Central journal article supplement (PMC4742162; doi:10.18632/oncotarget.5373), 2015-10-07
Supplement: oncotarget-06-36063-s001.pdf [file oncotarget-06-36063-s001.pdf]

## SUPPLEMENTARY MATERIALS AND METHODS

### 2D-WESTERN BLOT ANALYSIS

For 2D-Western blotting, 100 µg of proteins from MT fractions were subjected to isoelectrofocalisation using linear pH4–7 strips (GE-Healthcare) prior to second dimension electrophoresis, as described previously [3]. SDS-PAGE, transfer and immunodetection were performed as described in the experimental procedure section.

### RT-PCR ANALYSIS

Total RNA was isolated using Extract-ALL phenol-guanidine reagent (Eurobio) and chloroform, precipitated with isopropanol, and was reverse transcribed with SuperScriptIII (Life Technologies) according to the manufacturer's instructions. Real-time PCR was performed with SYBR Green (Applied Biosystems) detection using primers specific for *SEPT9\_v1* (forward CGGAGGCACCATGAAGAAGT, reverse GGGCCACTGGAGTCACCAA), *SEPT9\_v4\** (forward GGCAGGAGTGTTCATCTTTTC, reverse GCGTGCCTCCTGGACA), *TLL1* (forward GGTGCTCTGTCAGTGCCTATG, reverse TGCACACTCATCCAGTAAAAATTC), *TTL* (forward GAGGCTTCAGAGCTTCTCGA, reverse CCAGCTTCGGATGTCAAAC) and *CCPI* (forward GCTGCCCTTGGTGACTATA, reverse TTCTCCAGGATGTACCCGAG).

Relative gene expression is the ratio of the mRNA content of target genes to those of human *GAPDH* (forward CAGCCTCAAGATCATCAGCA, reverse TGTGGTCATGAGTCCTTCCA), 18S (forward TGAGAAACGGCTACCACATC, reverse TTACAGGGCCTCGAAAGAGT) and TBP-H2 (forward GAGAGCCACGAACCACGG, reverse ACATCACAGCTCCCCACCAT) house-keeping genes, according to the  $\Delta\Delta C_t$  method [84]. Reverse and forward oligonucleotide primers, specific to the chosen candidate and housekeeping genes, were designed using Primer3 software ([http://frodo.wi.mit.edu/cgi-bin/primer3/primer3\\_www.cgi](http://frodo.wi.mit.edu/cgi-bin/primer3/primer3_www.cgi)).

### REFERENCES

84. Livak KJ. Analysis of relative gene expression data using real-time quantitative PCR and the 2) Method. *Methods*. 2001; 25:402–408.
85. Spiliotis ET, Kinoshita M, Nelson WJ. A mitotic septin scaffold required for Mammalian chromosome congression and segregation. *Science*. 2005; 307:1781–1785.
86. Montagna C, Lyu MS, Hunter K, Lukes L, Lowther W, Reppert T, Hissong B, Weaver Z, Ried T. The Septin 9 (MSF) gene is amplified and overexpressed in mouse mammary gland adenocarcinomas and human breast cancer cell lines. *Cancer Res*. 2003; 63:2179–2187.

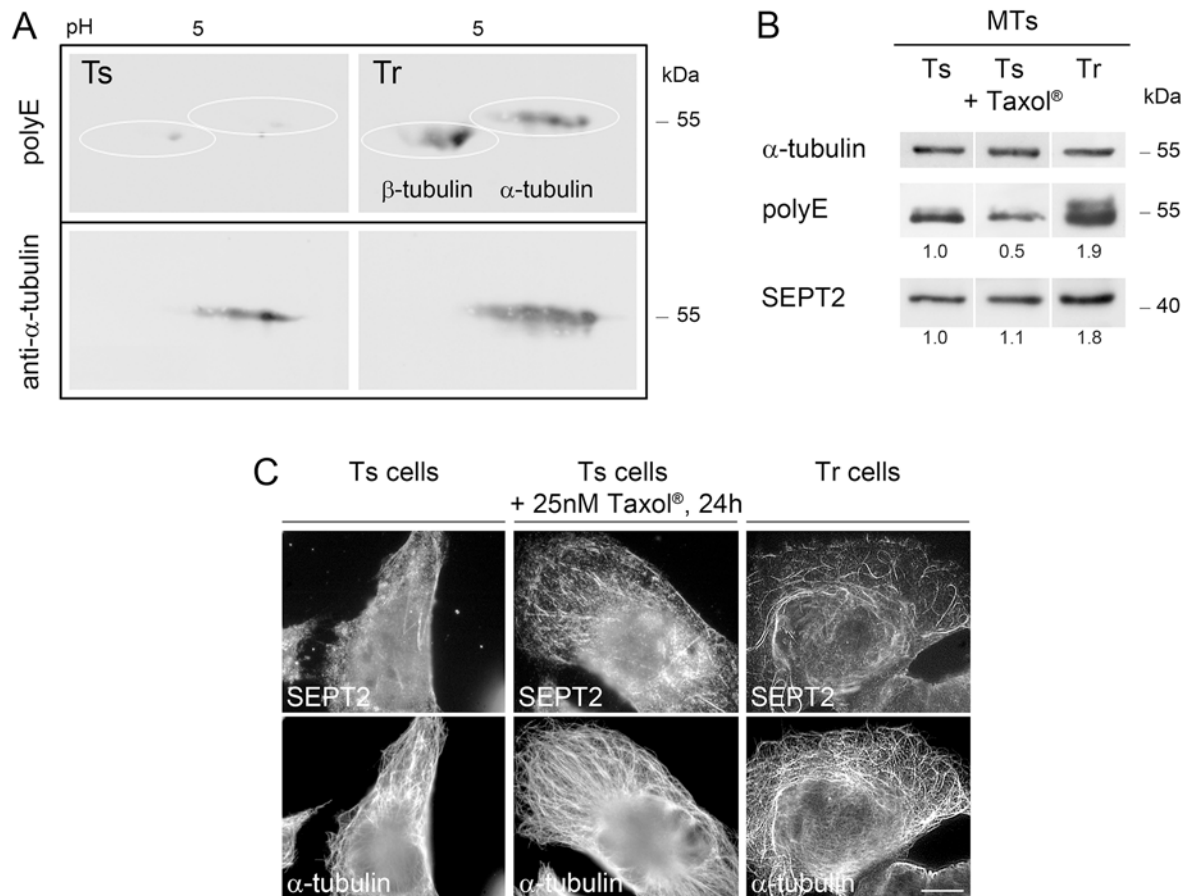

**Supplementary Figure S1: A. Both  $\alpha$ - and  $\beta$ -tubulin display long polyglutamylated chains in Tr cells.** Levels of polyglutamylation (polyE signal) of  $\alpha$ - and  $\beta$ -tubulin were analyzed by 2D-Western blotting on MT fractions of Ts and Tr cells. **B. MTs of Ts cells treated with 25 nM Taxol® for 24 h do not exhibit a higher level of long chain polyglutamylated tubulin (polyE signal) and septin recruitment than Ts cells.** **C. Acute Taxol® treatment of Ts cells (25 nM Taxol®, 24 h) does not relocalize septins to MTs.** Scale bar = 10  $\mu$ m.

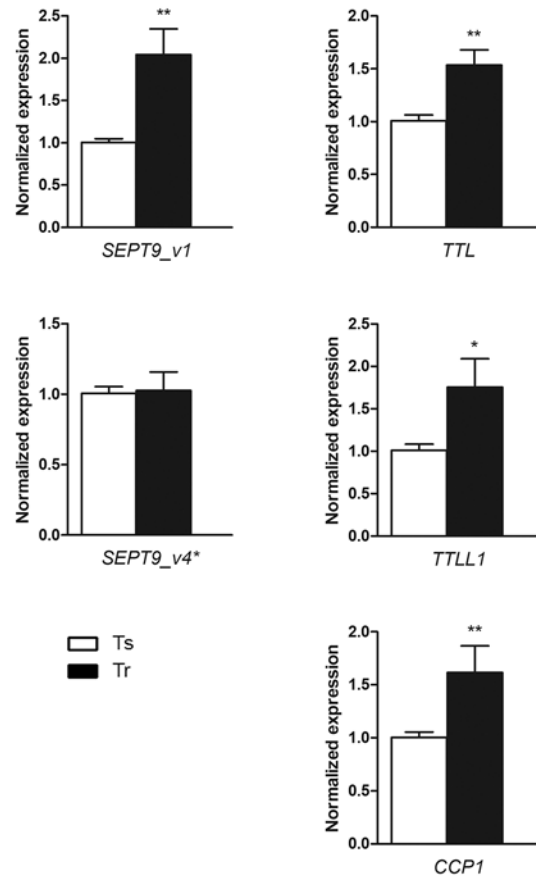

**Supplementary Figure S2: Transcript expression of septins and polyglutamylation enzymes were evaluated by qPCR analysis in Ts and Tr cells.** Histograms represent normalized transcripts expression.

**Supplementary Table S1: siRNA used to deplete cells of septins, tubulin modification enzymes and +TIPs**

| <i>siRNAs</i>   | <i>Suppliers</i>                                   | <i>Sequences</i>                                                                                            |
|-----------------|----------------------------------------------------|-------------------------------------------------------------------------------------------------------------|
| <i>SEPT2 1</i>  | Sigma <i>CUSTOM oligos</i> [85]                    | <i>sense</i> 5'-AAGGUGAAUUAUUGUGCCUGUC [dT][dT]-3'<br><i>antisense</i> 5'-GACAGGCACAAUAUUCACCUU [dT][dT]-3' |
| <i>SEPT2 2</i>  | Sigma <i>MISSION SASI_</i><br><i>Hs02_00305472</i> | <i>sense</i> 5'-GAAUGAGGACAUGAAUAAA [dT][dT]-3'<br><i>antisense</i> 5'-UUUAUUCAUGUCCUCAUUC [dT][dT]-3'      |
| <i>SEPT9 1</i>  | Sigma <i>CUSTOM oligos</i> [86]                    | <i>sense</i> 5'-GUCCACUUUAAUCAAUACC [dT][dT]-3'<br><i>antisense</i> 5'-GGUAUUGAUUAAAGUGGAC [dT][dT]-3'      |
| <i>SEPT9 2</i>  | Sigma <i>MISSION SASI_</i><br><i>Hs02_00325891</i> | <i>sense</i> 5'-GUGUGCAGAUCAUCCGUCU [dT][dT]-3'<br><i>antisense</i> 5'-AGACGGAUGAUCUGCACAC [dT][dT]-3'      |
| <i>SEPT11</i>   | Sigma <i>CUSTOM oligos</i> [65]                    | <i>sense</i> 5'-CAAGAGGAAUUGAAGAUUAAA [dT][dT]-3'<br><i>antisense</i> 5'-UUUAAUCUCAAUCCUCUUG [dT][dT]-3'    |
| <i>TTL 1</i>    | Sigma <i>MISSION SASI_</i><br><i>Rn02_00198137</i> | <i>sense</i> 5'-CCAACUAAGAGGUCAUUA [dT][dT]-3'<br><i>antisense</i> 5'-UUAAUGACCUCUAGUUGG [dT][dT]-3'        |
| <i>TTL 2</i>    | Sigma <i>MISSION SASI_</i><br><i>Hs01_00198137</i> | <i>sense</i> 5'-GAGUUCAUCAGUACC [dT][dT]-3'<br><i>antisense</i> 5'-UUAGGUACUGAUUGAACUC-3'                   |
| <i>TTL 3</i>    | Santa Cruz ( <i>sc-94871</i> )                     |                                                                                                             |
| <i>TLL1 1</i>   | Sigma <i>MISSION SASI_</i><br><i>Hs01_00245872</i> | <i>sense</i> 5'-GACAUCAUCAUCGACGACA [dT][dT]-3'<br><i>antisense</i> 5'-UGUCGUCGAUGAUGAUGUC-3'               |
| <i>TLL1 2</i>   | Santa Cruz ( <i>sc76772</i> )                      |                                                                                                             |
| <i>TLL5</i>     | Sigma <i>MISSION SASI_</i><br><i>Hs01_00168438</i> | <i>sense</i> 5'-GAAACUGUCUCGUCCUCU [dT][dT]-3'<br><i>antisense</i> 5'-UGUCGUCGAUGAUGAUGUC-3'                |
| <i>TLL11</i>    | Sigma <i>MISSION SASI_</i><br><i>Hs01_00141865</i> | <i>sense</i> 5'-CAUCUACUGGCAUGGAGUU [dT][dT]-3'<br><i>antisense</i> 5'-AACUCCAUGCCAGUAGAU-3'                |
| <i>CLIP-170</i> | Sigma <i>CUSTOM oligos</i>                         | <i>sense</i> 5'-GCACAGCUCUGAAGACACC [dT][dT]-3'<br><i>antisense</i> 5'-GGUGUCUUCAGAGCUGUC [dT][dT]-3'       |
| <i>MCAK</i>     | Santa Cruz ( <i>sc-105596</i> )                    |                                                                                                             |
